# Supplementary material for: Do psychological harms result from being labelled with an unexpected diagnosis of abdominal aortic aneurysm or prostate cancer through screening? A systematic review
Source: PubMed Central journal article supplement — BMJ Open. 2017 Dec 12;7(12):e017565. doi: 10.1136/bmjopen-2017-017565 (PMC5728272; doi:10.1136/bmjopen-2017-017565), 2017-12-12
Supplement: bmjopen-2017-017565supp001.pdf [file bmjopen-2017-017565supp001.pdf]

**Appendix A: Population-based Study Search**

|                             | <b>Prostate Cancer Studies</b>                                                                                                                                                                                                                                                                                                                                                                                                                                                                                                                                                                                                                                                                                    | <b>Abdominal Aortic Aneurysm Studies</b>                                                                                                                                                                                                                                                                                                                                                                                                                                                                                                                                                                                                    |
|-----------------------------|-------------------------------------------------------------------------------------------------------------------------------------------------------------------------------------------------------------------------------------------------------------------------------------------------------------------------------------------------------------------------------------------------------------------------------------------------------------------------------------------------------------------------------------------------------------------------------------------------------------------------------------------------------------------------------------------------------------------|---------------------------------------------------------------------------------------------------------------------------------------------------------------------------------------------------------------------------------------------------------------------------------------------------------------------------------------------------------------------------------------------------------------------------------------------------------------------------------------------------------------------------------------------------------------------------------------------------------------------------------------------|
| <b>Search date</b>          | 03/23/2015 for studies published from 01/01/2002 to 12/31/2014                                                                                                                                                                                                                                                                                                                                                                                                                                                                                                                                                                                                                                                    | 09/10/2015 for studies published from 01/01/2002 to 08/31/2015                                                                                                                                                                                                                                                                                                                                                                                                                                                                                                                                                                              |
| <b>Bridge searches</b>      | 09/10/2015 for studies published from 01/01/2015 to 08/31/2015<br><br>01/23/17 for studies published from 09/01/2015 to 01/23/17 on PubMed and CINAHL<br><br>03/08/2017 for studies published from 09/01/2015 to 01/31/17 on PsycINFO                                                                                                                                                                                                                                                                                                                                                                                                                                                                             | 01/23/17 for studies published from 09/01/2015 to 01/23/17 on PubMed and CINAHL<br><br>03/08/2017 for studies published from 09/01/2015 to 01/23/17 on PsycINFO                                                                                                                                                                                                                                                                                                                                                                                                                                                                             |
| <b>PubMed search string</b> | (Prostate cancer*[tw] OR prostatic cancer*[tw] OR Prostatic Neoplasms[Mesh] OR prostate specific antigen[tw] OR PSA[tw]) AND (screening*[tw] OR diagnos*[tw] OR early diagnosis[tw] OR early detection[tw] OR biops*[tw] OR surveillance[tw] OR watchful waiting[tw] OR overdiagnos*[tw] OR over diagnos*[tw] OR overdetect*[tw] OR over detect*[tw] OR insignifican*[tw]) AND (depress*[tw] OR distress[tw] OR stress*[tw] OR worry[tw] OR fear*[tw] OR anxiet*[tw] OR quality of life[tw] OR mental health[tw] OR mental disorders[tw] OR psycholog*[tw] OR psychosocial[tw] OR wellbeing[tw] OR well-being[tw] OR emotion*[tw] OR false positive*[tw] OR stigma[tw] OR shame[tw] OR label*[tw] OR suicid*[tw]) | (Abdominal aortic aneurysm[tw] OR Aortic Aneurysm, Abdominal[Mesh]) AND (screening*[tw] OR diagnos*[tw] OR early diagnosis[tw] OR early detection[tw] OR biops*[tw] OR surveillance[tw] OR watchful waiting[tw] OR overdiagnos*[tw] OR over diagnos*[tw] OR overdetect*[tw] OR over detect*[tw] OR insignifican*[tw]) AND (depress*[tw] OR distress[tw] OR stress*[tw] OR worry[tw] OR fear*[tw] OR anxiet*[tw] OR quality of life[tw] OR mental health[tw] OR mental disorders[tw] OR psycholog*[tw] OR psychosocial[tw] OR well being[tw] OR false positive*[tw] OR emotion*[tw] OR stigma[tw] OR shame[tw] OR label*[tw] OR suicid*[tw]) |
| <b>CINAHL via EBSCO</b>     | (MH "Prostatic Neoplasm*" OR "Prostate cancer*" OR "prostatic                                                                                                                                                                                                                                                                                                                                                                                                                                                                                                                                                                                                                                                     | (MH "Aortic Aneurysm, Abdominal" OR "abdominal aortic aneurysm*")                                                                                                                                                                                                                                                                                                                                                                                                                                                                                                                                                                           |

|                                                |                                                                                                                                                                                                                                                                                                                                                                                                                                                                                                                                                                                           |                                                                                                                                                                                                                                                                                                                                                                                                                                                                                                                                                               |
|------------------------------------------------|-------------------------------------------------------------------------------------------------------------------------------------------------------------------------------------------------------------------------------------------------------------------------------------------------------------------------------------------------------------------------------------------------------------------------------------------------------------------------------------------------------------------------------------------------------------------------------------------|---------------------------------------------------------------------------------------------------------------------------------------------------------------------------------------------------------------------------------------------------------------------------------------------------------------------------------------------------------------------------------------------------------------------------------------------------------------------------------------------------------------------------------------------------------------|
| <p><b>search string</b></p>                    | <p>cancer*" OR "prostate specific antigen" OR PSA)<br/>AND<br/>(screening* OR diagnos*[tw] OR "early diagnosis" OR "early detection" OR biops* OR surveillance OR "watchful waiting" OR overdiagnos* OR "over diagnos*" OR overdetect* OR "over detect*" OR insignifican*)<br/>AND<br/>(depress* OR distress OR stress* OR worry OR fear* OR anxiet* OR "quality of life" OR "mental health" OR "mental disorders" OR psycholog* OR psychosocial OR "well being" OR emotion* OR "false positive*" OR stigma OR shame OR label* OR suicid*)</p>                                            | <p>AND<br/>(screening* OR diagnos*[tw] OR "early diagnosis" OR "early detection" OR biops* OR surveillance OR "watchful waiting" OR overdiagnos* OR "over diagnos*" OR overdetect* OR "over detect*" OR insignifican*)<br/>AND<br/>(depress* OR distress OR stress* OR worry OR fear* OR anxiet* OR "quality of life" OR "mental health" OR "mental disorders" OR psycholog* OR psychosocial OR "well being" OR emotion* OR "false positive*" OR stigma OR shame OR label* OR suicid*)</p>                                                                    |
| <p><b>PsycINFO via EBSCO search string</b></p> | <p>("Prostatic Neoplasm*" OR "Prostate cancer*" OR "prostatic cancer*" OR "prostate specific antigen" OR PSA)<br/>AND<br/>(screening* OR "early diagnosis" OR "early detection" OR biops* OR surveillance OR "watchful waiting" OR overdiagnos* OR "over diagnos*" OR overdetect* OR "over detect*" OR insignifican*)<br/>AND<br/>(depress* OR distress OR stress* OR worry OR fear* OR anxiet* OR "quality of life" OR "mental health" OR "mental disorders" OR psycholog* OR psychosocial OR "well being" OR emotion* OR "false positive*" OR stigma OR shame OR label* OR suicid*)</p> | <p>("Aortic Aneurysm, Abdominal" OR "abdominal aortic aneurysm*")<br/>AND<br/>(screening* OR diagnos*[tw] OR "early diagnosis" OR "early detection" OR biops* OR surveillance OR "watchful waiting" OR overdiagnos* OR "over diagnos*" OR overdetect* OR "over detect*" OR insignifican*)<br/>AND<br/>(depress* OR distress OR stress* OR worry OR fear* OR anxiet* OR "quality of life" OR "mental health" OR "mental disorders" OR psycholog* OR psychosocial OR "well being" OR emotion* OR "false positive*" OR stigma OR shame OR label* OR suicid*)</p> |

**Appendix B: PRISMA Diagram**

PC = prostate cancer; AAA = abdominal aortic aneurysm

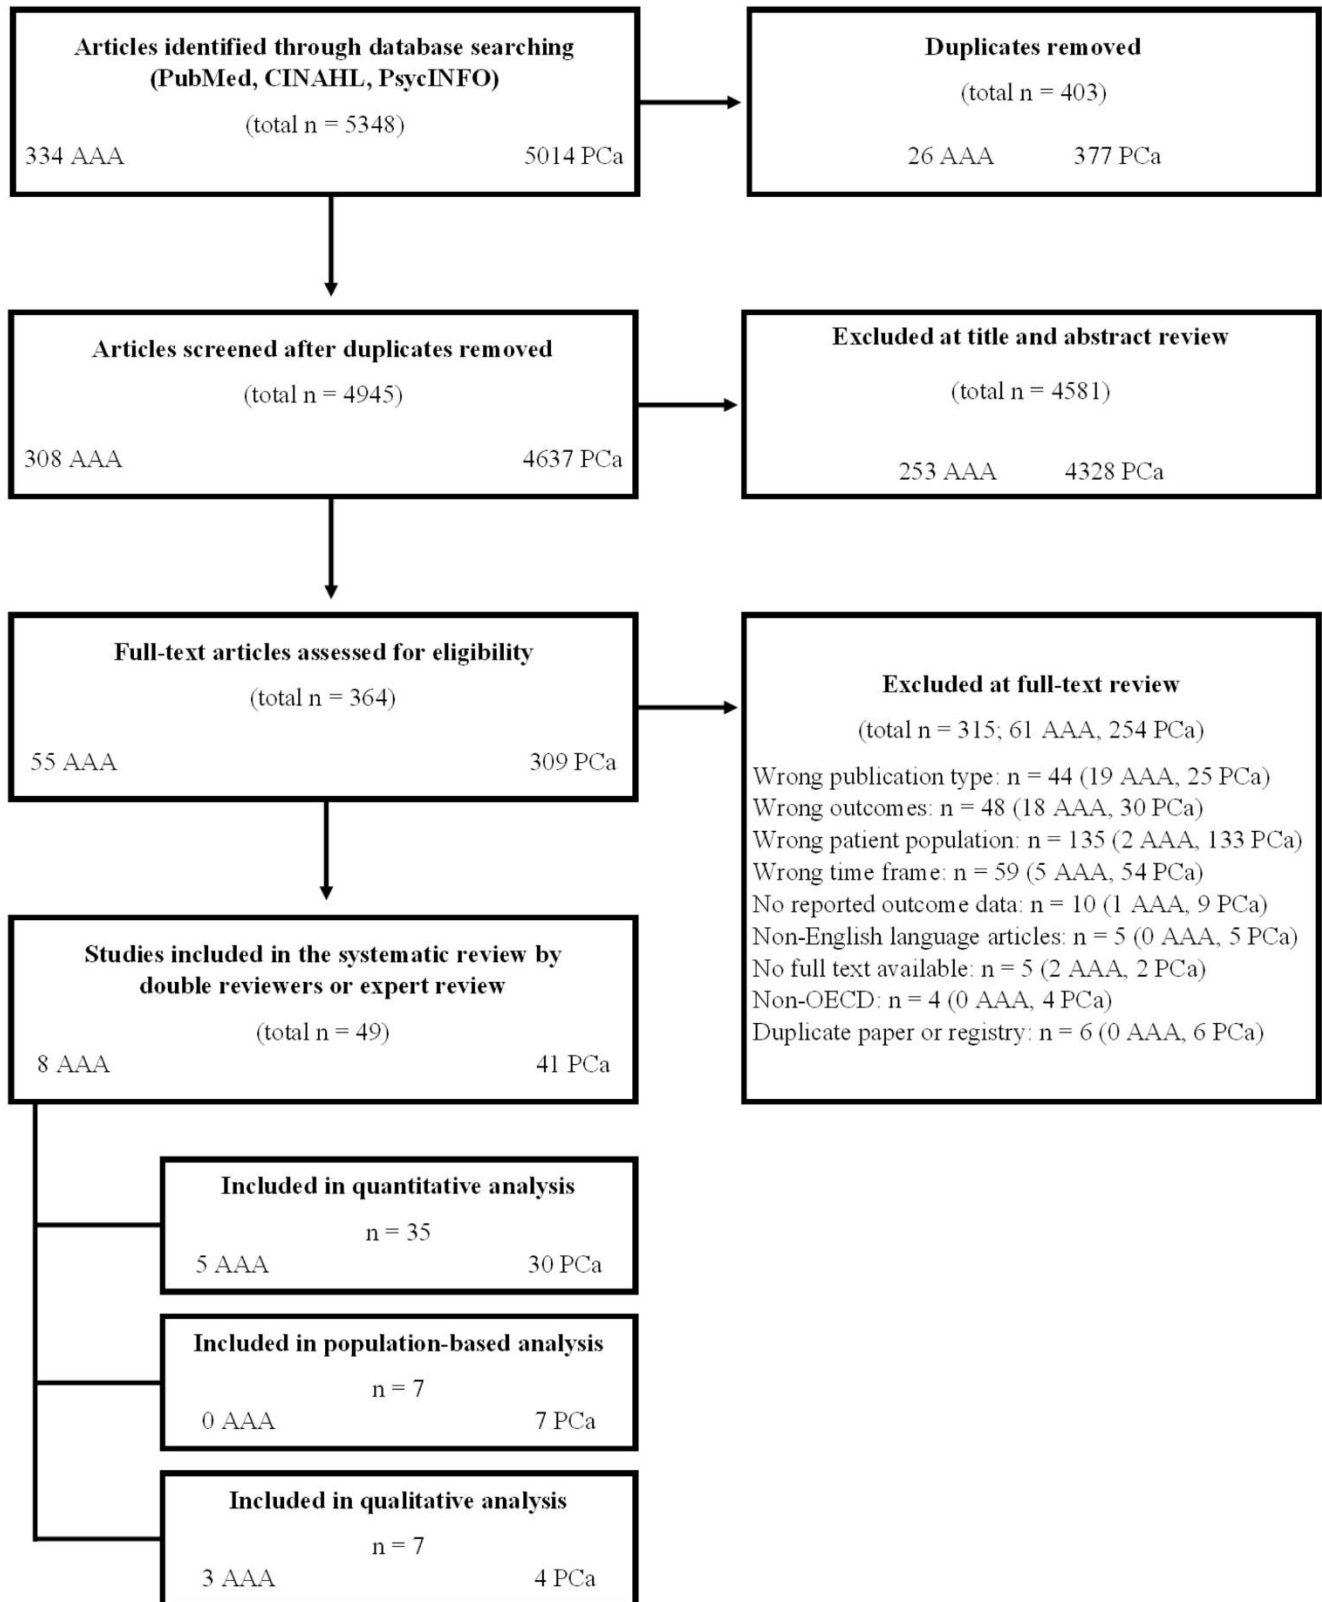

Appendix C. Quantitative abdominal aortic aneurysm studies

| First Author (Year)                                                 | Study design                                             | Number of subjects                                                 | Population (Sex; age; region)                                                                    | Type of sample of subjects/Recruitment                                                                                                                  | Time of psychological assessment                                                                                                       | Outcomes & Instruments                                                                         | Main results; comparisons made                                                                                                                                                                                                                                                                                                                                                                                                                                                                       | Evidence of psychological harm from screening                        |
|---------------------------------------------------------------------|----------------------------------------------------------|--------------------------------------------------------------------|--------------------------------------------------------------------------------------------------|---------------------------------------------------------------------------------------------------------------------------------------------------------|----------------------------------------------------------------------------------------------------------------------------------------|------------------------------------------------------------------------------------------------|------------------------------------------------------------------------------------------------------------------------------------------------------------------------------------------------------------------------------------------------------------------------------------------------------------------------------------------------------------------------------------------------------------------------------------------------------------------------------------------------------|----------------------------------------------------------------------|
| Lederle (2003) <sup>18</sup>                                        | RCT of treatment                                         | 1136 participants with AAA, 567 randomized to imaging surveillance | 99% men; mean age 68; U.S.                                                                       | Clinical. Patients were recruited over 5 years at 16 Veterans Affairs medical centers and randomized to immediate open surgical repair or surveillance. | Within 12 weeks of diagnosis but not before diagnosis; no comparison group                                                             | Outcomes: QoL<br>Instruments: SF-36, a general measure of QoL;                                 | Psychologic status from self-reported mental component of SF-36 before treatment (approximately 53), difficult to interpret as no comparison measure and only mean score given.<br><br>No relevant comparisons                                                                                                                                                                                                                                                                                       | Uncertain evidence of harm; only mean results; general measures only |
| De Rango (2011) <sup>19</sup>                                       | RCT of treatment                                         | 360 enrolled / 339 analyzed with AAA                               | 96% men; age 50-79, 10 European centres                                                          | Clinical. 10 European clinical centres                                                                                                                  | At the time of enrollment into RCT of surgery, after but not before diagnosis; no comparison group                                     | Outcomes: QoL<br>Instruments: SF-36, a general measure of QoL;                                 | Mental health component of SF-36 before treatment (71.8, administered by clinician), difficult to interpret as no comparison measure and only mean score given.<br><br>No relevant comparisons                                                                                                                                                                                                                                                                                                       | Uncertain evidence of harm; only mean results; general measures only |
| Knops (2014) <sup>20</sup>                                          | RCT of decision aid concerning treatment after diagnosis | 178 participants with AAA                                          | 87% men; age 74 (8) and 72 (9) in the two groups (decision aid and no decision aid); Netherlands | Clinical. Six center, randomized clinical trial in the Netherlands in outpatient clinics between Nov 2008 and June 2011                                 | At study enrollment i.e. First clinic visit, before treatment decision, time since diagnosis not reported; no measure before diagnosis | Outcomes: Anxiety<br>Instruments: HADS, a general measure                                      | Before treatment, anxiety score on HADS 4.9 in one treatment group and 5.7 in the other, difficult to interpret as no comparison measure and only mean score given.<br><br>No relevant comparisons                                                                                                                                                                                                                                                                                                   | Uncertain evidence of harm; only mean results; general measures only |
| The Multicentre Aneurysm Screening Study Group (2002) <sup>21</sup> | RCT of screening                                         | 599 with AAA, 631 screen-negatives, 726 non-screened controls      | Men; 65-74; four centers in the UK                                                               | Community-based. Subjects were randomly allocated to either receive an invitation for an abdominal ultrasound scan or not.                              | 6 weeks after screening among those who were invited for screening; also had a measure before screening and diagnosis                  | Outcomes: Depression, anxiety, QoL<br>Instruments: HADS, STAI, SF-36, all are general measures | Mean anxiety ( $p = 0.02$ ) and depression scores ( $p = 0.09$ ) were higher in screen positive compared with screen negative 6 weeks after screening, although the magnitude of mean difference was small.<br><br>Mental health component of SF-36 better in screen negative than screen positive at 6 weeks ( $p = 0.003$ ) and EQ-5D self-rated quality of life score lower in screen positive) than in screen negative ( $p = 0.0003$ after 6 weeks, both with somewhat larger mean differences. | Definite evidence of harm; only mean results; general measures only  |

|                                 |                  |                                                                 |                                                                                                                  |                                                                                  |                                                                            |                                                        |                                                                                                                                                                      |                                                                                          |
|---------------------------------|------------------|-----------------------------------------------------------------|------------------------------------------------------------------------------------------------------------------|----------------------------------------------------------------------------------|----------------------------------------------------------------------------|--------------------------------------------------------|----------------------------------------------------------------------------------------------------------------------------------------------------------------------|------------------------------------------------------------------------------------------|
|                                 |                  |                                                                 |                                                                                                                  |                                                                                  |                                                                            |                                                        | Compared only means, not percentage of patients with clinically-important changes<br><br>Only comparison is screen positive vs screen negative                       |                                                                                          |
| Eisenstein (2013) <sup>22</sup> | RCT of treatment | 728 patients with AAA, 362 received surveillance / 350 analyzed | 83.7% male in surveillance group, median age 70 (25 <sup>th</sup> -75 <sup>th</sup> percentiles 66.0-76.0); U.S. | Clinical. 70 sites - The Cleveland Clinic coordinating center managed the study. | Within 3 months of screening but not before diagnosis; no comparison group | Outcomes: QoL<br>Instruments: EQ-5D, a general measure | Anxious or depressed: 86/350 = 24.6% soon after diagnosis; difficult to interpret as no comparison measure and only mean score given.<br><br>No relevant comparisons | Possible evidence of harm; moderate frequency, uncertain severity; general measures only |

Results reported as mean (standard deviation) unless otherwise stated. Abbreviations: AAA, abdominal aortic aneurysm; EQ-5D, EuroQoL- 5 Dimension; HADS, Hospital Anxiety and Depression Scale; QoL, quality of life; RCT, randomized controlled trial; SF-36, The Short Form (36) Health Survey; STAI, State-Trait Anxiety Inventory

Appendix C. Quantitative prostate cancer studies

| First Author (Year)             | Study design    | Number of subjects                                                                               | Population (Age; region)                                                                            | Type of sample and subjects/Recruitment                                                                                             | Time of psychological assessment                                                                                               | Outcomes & Instruments                                                                              | Main results; Comparisons made                                                                                                                                                                                                                                                | Evidence of psychological harm from screening                                                                |
|---------------------------------|-----------------|--------------------------------------------------------------------------------------------------|-----------------------------------------------------------------------------------------------------|-------------------------------------------------------------------------------------------------------------------------------------|--------------------------------------------------------------------------------------------------------------------------------|-----------------------------------------------------------------------------------------------------|-------------------------------------------------------------------------------------------------------------------------------------------------------------------------------------------------------------------------------------------------------------------------------|--------------------------------------------------------------------------------------------------------------|
| Selli (2014) <sup>23</sup>      | Cohort          | 672 enrolled, 603 analyzed                                                                       | Mean 65.0 (5.73), median 66.0 (range 50–75)<br>Pan-European (Germany, France, Spain, Italy, Sweden) | Clinical. Prospective, 1-year, observational, pan-European study of men with prostate cancer of low-to-moderate risk of progression | All questionnaires were completed at baseline (within 2 months of diagnosis and before treatment); no measure before diagnosis | Outcomes: QoL, anxiety, depression<br>Instruments: EORTC QLQ-C30, EQ-5D, HADS, all general measures | QLQ-C30: Emotional functioning scale (n=396) 80.1 (3.88). Compared with age-matched normative data (UK general population), anxiety was significantly lower (p< 0.001) in the study population, while depression was similar.<br><br>Only comparison is with population norms | No evidence of harm; only comparison is with population norms; only mean results; general measures only      |
| Torvinen (2013) <sup>24</sup>   | Cross-sectional | 630 total, 47 had localized disease                                                              | 68.5 (8.2), range 44-93;<br>Southern Finland                                                        | Clinical. Recently diagnosed patients were enrolled when visiting the hospital.                                                     | Within 6 months of diagnosis (mean time 1.7 months); no measure before diagnosis                                               | Outcomes: QoL<br>Instruments: 15D dimensions: depression, distress, vitality), a general measure    | 15D mean scores for localized PCa compared with population norm: depression 0.032; distress 0.003; vitality 0.036, none of these statistically different from population norms<br><br>Only comparison is with population norms                                                | No evidence of harm; only comparison is with population norms; only mean results; general measures only      |
| Vasarainen (2012) <sup>25</sup> | Cohort          | 124 low risk PCa patients, 105 returned baseline questionnaire                                   | Median 64, range 55-74;<br>Finland                                                                  | Clinical. Recruitment according to the PRIAS protocol.                                                                              | At the start of surveillance; no measure before diagnosis                                                                      | Outcomes: QoL<br>Instrument: SF-36; a general measure                                               | SF-36 components: role emotional 82 (Finnish male population 74); vitality 76 (vs 70); mental health 81 (vs 75); all 3 comparisons p < 0.005<br><br>Only comparison is with population norms                                                                                  | No evidence of harm; only comparison with general population norms; only mean results; general measures only |
| Ishihara (2006) <sup>26</sup>   | Cohort          | 141 PCa patients with high PSA detected by screening, scheduled for prostate biopsy, 73 had PCa. | Men; 71.8 (7.4);<br>Japan                                                                           | Outpatients who were suspected to have prostate cancer as a result of screening                                                     | Before biopsy and after diagnosis; no measure before screening                                                                 | Outcomes: QoL<br>Instrument: SF-36, a general measure                                               | SF-36 component mean mental health score post diagnosis ages 60-69: 68.9 (vs 74.7 national norm), p < 0.05; for age 70+, 63.2 (vs 73.3 national norm), p < 0.005<br><br>Only comparison is with population norms.                                                             | Definite evidence of harm using population norm comparison; only mean results; general measures only         |

|                              |                 |                                                                               |                                                                               |                                                                                                                                             |                                                                                    |                                                                                   |                                                                                                                                                                                                                                                                                                                                                                                                                                                                               |                                                                                                                                               |
|------------------------------|-----------------|-------------------------------------------------------------------------------|-------------------------------------------------------------------------------|---------------------------------------------------------------------------------------------------------------------------------------------|------------------------------------------------------------------------------------|-----------------------------------------------------------------------------------|-------------------------------------------------------------------------------------------------------------------------------------------------------------------------------------------------------------------------------------------------------------------------------------------------------------------------------------------------------------------------------------------------------------------------------------------------------------------------------|-----------------------------------------------------------------------------------------------------------------------------------------------|
| Oba (2014) <sup>27</sup>     | Cohort          | 184 participants, 99 with localized PCa, 85 without PCa                       | Men, 50s - 80+ (mean 68.8, sd 6.5); Japan/Gunma                               | Patients referred for biopsy, cancer clinic-based recruitment before prostate biopsy                                                        | Before biopsy and 1 month after informed of diagnosis; no measure before screening | Outcomes: Kessler psychological distress scale (K6), a general measures           | K-6: Primary comparison given is between PCa patients vs no-PCa patients before biopsy and at 1 month after diagnosis:<br><br>Scores 4.1 and 4.5 (PCa) vs 2.7 and 2.6 (non-PCa); although distress was higher for PC patients, it was higher both before and after biopsy, with no statistically significant change in either group.<br><br>Higher distress in PCa group vs no PCa group, but both before and after biopsy; some increase in PCa relative to no-PCa patients. | Uncertain evidence of harm as higher distress in PCa vs no-PCa patients both before and after biopsy; only mean results; general measure only |
| Acar (2014) <sup>28</sup>    | Cohort          | 263 with localized PCa, receiving Active Surveillance; 50 analyzed            | 63.8 (6.9), 49–85; Amsterdam, the Netherlands                                 | Clinical selection of patients from a prospective prostate cancer database.                                                                 | Baseline before treatment initiation; no pre-diagnosis measure                     | Outcomes: QoL Instruments: EORTC-QLQ-C30-domain 15, a general measure             | Means compared between treatment groups, but no clear means for pre-treatment group as a whole on psychological state alone, without other physical factors.<br><br>No relevant comparisons                                                                                                                                                                                                                                                                                   | Uncertain evidence of harm; only mean results; general measures only                                                                          |
| Berry (2006) <sup>29</sup>   | Cross-sectional | 260 with localized PCa                                                        | 63.2 ( 8.1) range 43-83; Puget Sound region, Washington                       | Clinical. Invited in clinic after diagnosis at 3 treatment centers + men with PCa who called the Cancer Information Service for information | At the time of of the “options talk” - before treatment decision                   | Outcomes: Anxiety Instrument: STAI                                                | State anxiety mean 32.74 (range 20-71); Trait anxiety 31.19 (range 20-62)<br><br>Possible harm with large range; frequency not given<br><br>No relevant comparisons                                                                                                                                                                                                                                                                                                           | Uncertain evidence of harm; only mean results; general measures only                                                                          |
| Chhatre (2011) <sup>30</sup> | Cohort          | 198 with PCa                                                                  | 64.1 (8.6) and 63.0 (7.9) for white and black, respectively; Philadelphia, PA | Clinical. Urology clinics of urban healthcare system and VA Medical Center                                                                  | Within 4 months of diagnosis                                                       | Outcomes: QoL Instruments: FACT-P, emotional well-being score                     | Baseline emotional well-being mean score on FACT was 19.4 (Caucasian) and 20.6 (African-American), means only<br><br>No relevant comparisons with other groups or with pre-diagnosis state                                                                                                                                                                                                                                                                                    | Uncertain evidence of harm; only mean results; general measures only                                                                          |
| Couper (2009) <sup>31</sup>  | Cohort          | 211 with PCa recruited; 193 completed the baseline questionnaire, 61 chose WW | Mean age 66.15 (range 43-92); Melbourne, Australia                            | Clinical. Recruitment by urologists and oncologists-PCa pts attending clinics in public hospitals and private practices.                    | Close to initial diagnosis and close to treatment; no pre-diagnosis measure        | Outcomes: Depression and anxiety, QoL Instruments: Brief Symptom Inventory, SF-36 | Watchful waiting group mean Brief Symptom Inventory: depression score 0.147; anxiety 0.246<br><br>SF-36 mental health mean 80.59<br><br>Comparisons only among treatment groups; no relevant comparisons                                                                                                                                                                                                                                                                      | Uncertain evidence of harm; only mean results; general measures only                                                                          |

|                                  |        |                                                                                         |                                                                                 |                                                                                                                                      |                                                                                                                     |                                                          |                                                                                                                                                                                                   |                                                                      |
|----------------------------------|--------|-----------------------------------------------------------------------------------------|---------------------------------------------------------------------------------|--------------------------------------------------------------------------------------------------------------------------------------|---------------------------------------------------------------------------------------------------------------------|----------------------------------------------------------|---------------------------------------------------------------------------------------------------------------------------------------------------------------------------------------------------|----------------------------------------------------------------------|
| Jayadevappa (2012) <sup>32</sup> | Cohort | 214 with PCa enrolled / 195 analyzed                                                    | 69.87 (4.5) and 71.25 (4.1) for white and black, respectively; Philadelphia, PA | Clinical. Urban academic hospital and a VA hospital                                                                                  | Caucasian vs. AA. Timepoints: baseline, 3, 6, 12 months; no measure before diagnosis                                | Outcomes: QoL<br>Instrument: SF-36, a general measure    | Baseline mental health mean score (SF-36), Caucasian 81.8, African-American 75.8<br><br>No comparisons with other groups or with these groups before diagnosis, therefore no relevant comparisons | Uncertain evidence of harm; only mean results; general measures only |
| Jayadevappa (2012) <sup>33</sup> | Cohort | 602 with PCa at baseline                                                                | 63.3 (8.0); Pennsylvania                                                        | Clinical. Urban academic hospital and a VA hospital                                                                                  | Baseline before treatment initiation; no measure before diagnosis                                                   | Outcomes: QoL<br>Instruments: SF-36                      | Baseline SF-36 mental health mean score 76.4<br><br>No relevant comparisons                                                                                                                       | Uncertain evidence of harm; only mean results; general measures only |
| Loiselle (2010) <sup>34</sup>    | Cohort | 45 with PCa, to undergo an intervention, broken into 2 groups, measures at baseline     | 62.3 (7.7) and 67.7 (9.6) for the two groups; Quebec, Canada                    | Clinical. Convenience sample recruited from four oncology ambulatory clinics and large teaching hospitals                            | At enrollment; no pre-diagnosis measure                                                                             | Outcomes: Anxiety, QoL<br>Instruments: STAI, SF-36, CESD | Mean CESD depression score 15.8 and 19.8<br><br>Mean STAI anxiety 30.1 and 36.1<br><br>Mean SF-36 mental health 58.7 and 53.0<br><br>No relevant comparisons                                      | Uncertain evidence of harm; only mean results; general measures only |
| Siston (2003) <sup>35</sup>      | Cohort | Of the PCa patients enrolled (n = 140), 70% (n = 98) had localized disease, 39 chose WW | Mean 69, range 47–84; United States                                             | Clinical. All patients with newly diagnosed PCa who met the eligibility criteria at five VA Medical Centers across the United States | Median time from diagnosis was 1.2 months, with 85% enrolled within 2 months of diagnosis; no pre-diagnosis measure | Outcomes: QoL<br>Instruments: EORTC-QLQ-C30+3            | Watchful waiting baseline mean emotional score 83.5<br><br>Comparisons only among treatment groups<br><br>No relevant comparisons                                                                 | Uncertain evidence of harm; only mean results; general measures only |
| Korfage (2006) <sup>36</sup>     | Cohort | Screen arm of prostate cancer screening trial, 52 diagnosed with PCa                    | Men; 67.3 (4.4), range 60-74; Rotterdam, Netherlands                            | Registry based participants from ERSPC screening trial                                                                               | Before screening and median 31 days after diagnosis                                                                 | Outcomes: QoL<br>Instrument: SF-36, a general measure    | SF-36 mental health mean score 2 months before diagnosis: 83.2; 1 month after diagnosis 75.8, p < .001<br><br>Comparison is before and after diagnosis in screening study                         | Definite evidence of harm; only mean results; general measures only  |
| Perczek (2002) <sup>37</sup>     | Cohort | 101 scheduled for biopsy completed                                                      | Men; 66.7 (7.5), 46-87; Miami, FL and Palo Alto, CA                             | Patients scheduled for a prostate biopsy at the urology clinics                                                                      | Before biopsy and 2 weeks after biopsy and                                                                          | Outcomes: Distress<br>Instruments: POMS                  | Prebiopsy Mean POMS distress score in men diagnosed with PCa increased from 0.61 to 0.79; in men not diagnosed with cancer mean                                                                   | Definite evidence of harm; only mean                                 |



|                               |                 |                                                             |                                                                                   |                                                                                                                                                   |                                                                                         |                                                                                                                                            |                                                                                                                                                      |                                                                                                                 |
|-------------------------------|-----------------|-------------------------------------------------------------|-----------------------------------------------------------------------------------|---------------------------------------------------------------------------------------------------------------------------------------------------|-----------------------------------------------------------------------------------------|--------------------------------------------------------------------------------------------------------------------------------------------|------------------------------------------------------------------------------------------------------------------------------------------------------|-----------------------------------------------------------------------------------------------------------------|
|                               |                 | interviews, 37.6% (n =38) received a PCa diagnosis          |                                                                                   |                                                                                                                                                   | diagnosis or non-diagnosis; no measure before screening                                 |                                                                                                                                            | scores decreased after biopsy from 0.72 to 0.62<br><br>All p < 0.05<br><br>Comparison is before biopsy and after diagnosis in men diagnosed with PCa | results; general measures only                                                                                  |
| Mohan (2009) <sup>38</sup>    | Cross-sectional | 184 with localized PCa total; 23 (12.5%) patients chose WW. | 68.2 (5.9); Norfolk, Virginia.                                                    | Clinical. All patients were recruited from a large, private urology practice.                                                                     | Baseline within 6 months of diagnosis; no pre-diagnosis measure                         | Outcomes: Depression and anxiety, life satisfaction<br>Instruments: SF-36, HADS, Life satisfaction scale                                   | 3.4% at least mild depression; 20.8% at least mild anxiety; mental health mean (SF-36): 44.1 (+/- 6.8)<br><br>No relevant comparison                 | Uncertain evidence of harm; gives some frequencies and severity, but mostly mean results; general measures only |
| Bisson (2002) <sup>39</sup>   | Cross-sectional | 88 with PCa                                                 | 64.5 (6.7, 48–78); Wales UK                                                       | Clinical. Patients were consecutive referrals with a new diagnosis of clinically localized prostate cancer to a clinic                            | Before first clinic appointment. "Newly diagnosed patients"; no pre-diagnosis measure   | Outcomes: QoL, distress, anxiety, depression, psychological response to diagnosis<br>Instruments: SF-36, GHQ30, HADS, IES-R, EORTC-QLQ-C30 | From 8% to 14% showed high anxiety levels<br><br>No relevant comparisons                                                                             | Possible evidence of harm as gives frequencies and severity; general measures only                              |
| Chambers (2014) <sup>40</sup> | Cohort          | 740 with PCa                                                | 63.4 (7.5), range 43.3-83.6; South East and North Queensland, Australia           | Clinical. Men were referred to the project by their urologists if they had localized prostate cancer suitable for treatment with curative intent. | Median time since diagnosis 19 days; mean 25.6 days (SD 26.9); no pre-diagnosis measure | Outcomes: Distress<br>Instruments: DT, scale 0-10; IES-R: a cut-off of >33 out of a total possible score of 88 indicates high distress     | 10% were distressed by IES-R measure<br><br>No relevant comparisons                                                                                  | Possible evidence of harm as gives frequency and severity; general measures only                                |
| Mohamed (2012) <sup>41</sup>  | Cohort          | 986 with PCa enrolled / 869 analyzed                        | 65.45 (7.57), 39 - 83 years; Northeast of the US                                  | Clinical. Patients, tertiary cancer center; patients entering treatment.                                                                          | Within 4 to 6 weeks of diagnosis; no pre-diagnosis measure                              | Outcomes: Depression<br>Instruments: CES-D, cut-off score 9 indicating elevated depressive symptoms                                        | 19.7% had clinically elevated levels of depressive symptoms at baseline, after diagnosis but before treatment<br><br>No relevant comparisons         | Possible evidence of harm as gives frequency and severity; general measures only                                |
| Punnen (2013) <sup>42</sup>   | Cohort          | 679 total with PCa, 122 chose AS                            | 60.1 (6.7) for all, 60.5 (6.5) for AS; Department of Urology at The University of | Clinical. Prospective cohort of newly diagnosed patients.                                                                                         | Before initial clinic visit, not specified how soon after diagnosis; no                 | Outcomes: Depression, anxiety, distress<br>Instruments: PHQ-9 (depression) and GAD-7 (anxiety); Distress thermometer (DT)                  | Moderate to severe anxiety and depression frequencies < 5%;<br><br>Elevated distress was 14% to 20%.<br><br>No relevant comparisons                  | Possible evidence of harm as gives frequencies and severity; general measures only                              |

|                                    |                 |                                                                                      |                                                         |                                                                                                                                                                                                             |                                                                                                                                       |                                                                                                                                               |                                                                                                                                                                                                                                                                                                                                                           |                                                                                                       |
|------------------------------------|-----------------|--------------------------------------------------------------------------------------|---------------------------------------------------------|-------------------------------------------------------------------------------------------------------------------------------------------------------------------------------------------------------------|---------------------------------------------------------------------------------------------------------------------------------------|-----------------------------------------------------------------------------------------------------------------------------------------------|-----------------------------------------------------------------------------------------------------------------------------------------------------------------------------------------------------------------------------------------------------------------------------------------------------------------------------------------------------------|-------------------------------------------------------------------------------------------------------|
|                                    |                 |                                                                                      | California, San Francisco (UCSF)                        |                                                                                                                                                                                                             | pre-diagnosis measure                                                                                                                 |                                                                                                                                               |                                                                                                                                                                                                                                                                                                                                                           |                                                                                                       |
| Soloway (2005) <sup>43</sup>       | Cross-sectional | 103 with PCa                                                                         | Mean 62, median (range) 62 (43–80); Miami, Florida, US. | Clinical. Following methods of convenience sampling, consecutive untreated referrals were identified in the academic outpatient setting.                                                                    | 85% of the patients had been diagnosed within the last 3 months; no pre-diagnosis measure                                             | Outcomes: Depression, distress<br>Instruments: BDI, POMS, VAS of distress                                                                     | Frequency of depression according to BDI cutoffs: mild-moderate 19.2%; moderate-severe, 2%; and severe 0%. The mean BDI score (5.63) and mean POMS total mood disturbance score (51.52) were within normal range.<br><br>No relevant comparisons                                                                                                          | Possible evidence of harm as gives frequency and severity; general measures only                      |
| van den Bergh (2009) <sup>44</sup> | Cross-sectional | 129 with PCa                                                                         | 64.9 (6.89); the Netherlands                            | Clinical. Between May 2007 and May 2008, all Dutch men (N = 150) who had a recent (<6 months) diagnosis of PCA and who were included in the PRIAS study received a QoL questionnaire at their home address. | Within 6 months of diagnosis, mean 2.7 months (SD 1.7); no pre-diagnosis measure                                                      | Outcomes: Depression, anxiety, QoL<br>Instruments: CES-D: clinical threshold 16, STAI-6: clinical threshold 44, MAX-PC (PCA-specific anxiety) | 8% scored above clinical cut-point for depression, 17% for anxiety (both general measures); 7% scored high on prostate cancer –specific anxiety (condition – specific measure)<br><br>No relevant comparisons                                                                                                                                             | Possible evidence of harm as gives frequency and severity; one condition-specific measure for anxiety |
| Love (2008) <sup>45</sup>          | Cohort          | 211 with early-stage PCa; 169 community comparison group (unclear how selected)      | Men; 66.15 (8.26), 43-92; Victoria, Australia           | Recruited from hospitals, with a matched group of community volunteers (n=169)                                                                                                                              | Measures after diagnosis but before treatment compared with similar community controls without cancer                                 | Outcome instrument: SF-36                                                                                                                     | Mean role emotional score SF-36: early-stage PCa 79.41 vs community controls 88.49, p < 0.001<br><br>Mean mental health SF-36: early-stage 77.78 vs community controls 80.92, not statistically significant<br><br>Comparison is between men with early-stage PCa and community controls                                                                  | Definite evidence of harm; means only; has relevant control group; general measures only              |
| Wade (2013) <sup>46</sup>          | Cohort          | 1144 scheduled for biopsy returned questionnaire, 405 diagnosed with prostate cancer | Men; 62.3 (5.2), range 50-59 United Kingdom             | Asymptomatic men in primary care                                                                                                                                                                            | T1: initial PSA testing<br>T2: before biopsy<br>T3: 7 days after biopsy<br>T4: 35 days after biopsy (after receipt of biopsy results) | Outcomes: Anxiety, depression<br>Instruments: HADS Anxiety, HADS Depression ; general measures                                                | Clinical anxiety in 12.9% of men after diagnosis of PCa, compared with 6% before biopsy (but after elevated PSA); p < 0.05<br><br>Clinical depression in 3.4% of men after diagnosis of PCa, compared with 1.4% before biopsy (but after elevated PSA); p < 0.05<br><br>Comparison between men diagnosed with PCa before and after learning of diagnosis. | Definite evidence of harm; has relevant comparison and frequency and severity; general measures only  |

|                                    |                     |                                                                                                                                 |                                                                                              |                                                                                                                                                                                                                                                                                                                                                                   |                                                                                         |                                                                                                                                                  |                                                                                                                                                                                                                                                                      |                                                                                                                              |
|------------------------------------|---------------------|---------------------------------------------------------------------------------------------------------------------------------|----------------------------------------------------------------------------------------------|-------------------------------------------------------------------------------------------------------------------------------------------------------------------------------------------------------------------------------------------------------------------------------------------------------------------------------------------------------------------|-----------------------------------------------------------------------------------------|--------------------------------------------------------------------------------------------------------------------------------------------------|----------------------------------------------------------------------------------------------------------------------------------------------------------------------------------------------------------------------------------------------------------------------|------------------------------------------------------------------------------------------------------------------------------|
| Bellardita (2013) <sup>47</sup>    | Cohort              | 154 with PCa enrolled / 103 analyzed                                                                                            | 67 (7), Milan, Italy                                                                         | Clinical. Enrolled via clinic if eligible                                                                                                                                                                                                                                                                                                                         | At study entry, after PCa diagnosis, no pre-diagnosis measure                           | Outcomes: QoL, coping with cancer<br>Instruments: FACT-P, condition-specific measure; Mini-MAC, general cancer measure                           | 28% had low score on emotional well-being; 11% had high score on helplessness/hopelessness; 11% increased anxious preoccupation score;<br><br>No relevant comparisons                                                                                                | Possible evidence of harm; gives frequency and severity; one condition-specific measure                                      |
| Bill-Axelsson (2013) <sup>48</sup> | RCT                 | 272 total with localized PCa, 136 with WW, 99 analyzed                                                                          | 64.5 (4.7) for WW group and 64.4 (4.7) for RP group; 14 centers in Sweden, Finland, Iceland. | Clinical. Multi-center trial.                                                                                                                                                                                                                                                                                                                                     | Time of baseline questionnaire from diagnosis is not reported; no pre-diagnosis measure | Outcomes: QoL<br>Instruments: Questionnaire developed by the authors, unvalidated                                                                | Almost all men reported that PCA negatively influenced daily activities and relationships. Health-related distress, worry, feeling low, and insomnia were consistently reported by approximately 30-40%.<br><br>No relevant comparisons                              | Possible evidence of harm; gives frequency and severity; no relevant comparison; condition-specific but unvalidated measures |
| Steginga (2004) <sup>49</sup>      | Cohort              | 111 with PCa                                                                                                                    | 61.5 (8.1). Queensland, Australia.                                                           | Clinical. The participants were men newly diagnosed with localized prostate cancer recruited from two hospital urology clinics and four urologists' private practices                                                                                                                                                                                             | Time since diagnosis 4.3 (4.6) weeks; no pre-diagnosis measure                          | Outcomes: Psychological response to diagnosis, life satisfaction<br>Instruments: IES-R, Constructed Meaning Scale, Satisfaction with Life Scale. | 24% had high and 41% had moderate levels of avoidance, 16% had high and 43% had moderate levels of intrusion<br><br>No relevant comparisons                                                                                                                          | Possible evidence of harm; gives frequencies and severity; general measures only                                             |
| <b>First Author (Year)</b>         | <b>Study design</b> | <b>Number of subjects</b>                                                                                                       | <b>Population (Age; region)</b>                                                              | <b>Type of sample and subjects/Recruitment</b>                                                                                                                                                                                                                                                                                                                    | <b>Time of psychological assessment</b>                                                 | <b>Outcomes &amp; Instruments</b>                                                                                                                | <b>Main results; Comparisons made</b>                                                                                                                                                                                                                                | <b>Evidence of psychological harm from screening</b>                                                                         |
| Alexander (2015) <sup>50</sup>     | Cross-sectional     | 1291 approached, 923 consented, 724 included<br><br>Community Controls without PCa: 1492 contacted, 623 consented, 552 included | 55-75+<br><br>Queensland, Australia                                                          | Clinical. Referred by urologists to the Prostate Cancer Supportive Care and Patient Outcomes Project (ProsCan), a randomized control trial, between Apr 2005 and July 2007. Excluded if not European ethnicity. or had brother in study.<br><br>Controls: men with no history of PC from the Queensland Men's Health Study cross-sectional population-based study | 4 weeks after diagnosis<br><br>Controls: at recruitment                                 | Outcomes: QoL<br>Instruments: SF-36v2                                                                                                            | Mental health summary measure, mean (SD): PCa (n = 704): 48.05 (9.95)<br>Controls (n = 466): 50.70 (9.99) p<0.001<br><br>Mental Health score, mean (SD): PCa (n = 718): 48.54 (10.20)<br>Controls (n = 529): 49.85 (10.20) p=0.024<br><br>Community comparison group | Definite evidence of harm; community comparison group; only mean results; general measures only                              |

|                             |                       |                                          |                                                                                                                                                                                                                                                     |                                                                                                                                                                                                                                                        |                                                                                                                                                                                             |                                                                                                      |                                                                                                                                                                                                                      |                                                                      |
|-----------------------------|-----------------------|------------------------------------------|-----------------------------------------------------------------------------------------------------------------------------------------------------------------------------------------------------------------------------------------------------|--------------------------------------------------------------------------------------------------------------------------------------------------------------------------------------------------------------------------------------------------------|---------------------------------------------------------------------------------------------------------------------------------------------------------------------------------------------|------------------------------------------------------------------------------------------------------|----------------------------------------------------------------------------------------------------------------------------------------------------------------------------------------------------------------------|----------------------------------------------------------------------|
| Parker (2016) <sup>51</sup> | Cross-sectional       | 180 men with low risk PCa                | Range 40-87<br><br>Mean 67.2 (8.9)<br><br>Houston, TX (University of Texas MD Anderson Cancer Center)                                                                                                                                               | Clinical. Hospital enrollment if met criteria, enrolled during 2006-2012 into AS protocol within 6 months of diagnosis. Inclusion criteria amended in 2007 to include biopsy done within 6 months of diagnosis at enrollment.<br><br>No control group. | Within 6 months of diagnosis (baseline values applicable only)                                                                                                                              | Outcomes: Mental health and anxiety component summary score of SF-12<br><br>Instruments: SF-12, STAI | At T1: SF-12, Mental component summary score, mean: 53.2<br><br>Baseline STAI, mean: 30.9, compared with a normative sample of males was in the 40th percentile<br><br>No relevant comparisons                       | Uncertain evidence of harm; only mean results; general measures only |
| Kent (2016) <sup>52</sup>   | Registry based cohort | 1,311 men diagnosed with PCa in registry | Before diagnosis majority between 65-74 yo (68.0%), after diagnosis even split between 65-74 (46.8%) and 75-84 (46.1%)<br><br>SEER-MHOS linkage data collection years 1998-2011 which involved Medicare Advantage enrollees with and without cancer | Registry: SEER-MHOS linkage data collection years 1998-2011                                                                                                                                                                                            | comparison between 1 <sup>st</sup> survey before dx and 1 <sup>st</sup> survey after diagnosis (specific time not given) and comparison between population participants with vs without PCa | Outcomes:<br><br>SF 36 (short form): Mental component summary score                                  | Mental component summary score mean +SD<br><br>Before dx: 53.7 +/- 9.0<br><br>1st survey after dx: 52.0 +/- 10.2<br><br>Community participants without cancer: 52.1 +/- 10.3<br><br>Has 2 relevant comparison groups | No evidence of harm; only mean results; general measures only        |

Results reported as mean (standard deviation) unless otherwise stated. Abbreviations: PCA, prostate cancer; WW, watchful waiting; AS, active surveillance; RCT, randomized controlled trial; QoL, quality of life; HRQL, health-related quality of life, EORTC QLQ-C30, European Organization for Research and Treatment of Cancer Quality of Life Questionnaire-Cancer 30; FACT-P, Functional Assessment of Cancer Therapy Prostate version; Mini-MAC, Mini-Mental Adjustment to Cancer; STAI, State-Trait Anxiety Inventory; SF-36, The Short Form (36) Health Survey; SF-12, Medical Outcomes Study 12-item short-form health survey; MCS, mental component summary; GHQ30, the 30-Item General Health Questionnaire; HADS, Hospital Anxiety and Depression Scale; IES-R, the Impact of Event Scale-Revised; DT, Distress Thermometer; 15D, 15 Dimensions index; CES-D, Center for Epidemiological Studies Depression scale; Patient Health Questionnaire (PHQ-9); GAD-7, General Anxiety Disorder scale 7; VAS, Visual analogue scale; EQ-5D, EuroQol- 5 Dimension; BDI, Beck Depression Inventory, POMS, The Profile of Mood States; MAX-PC, Memorial Anxiety Scale for Prostate Cancer; BCWI, Brief Cancer-related Worry Inventory; K-6, Kessler psychological distress scale; CIDI, Composite International Diagnostic Interview; BSI-53, Brief Symptom Inventory; STAI, Spielberger State-Trait Anxiety Inventory for Adults.

Appendix D

Evidence Tables: AAA Qualitative Studies

| Author, Year, Title, Journal                                                                                                                                                                                          | Recruitment, Research Design, Study Population                                                                                                                                                                                                                                                                                                                                                                                                                                                                                                                                                                                                                                                                           | Time Points                                                                                                                                                                                                                                 | Themes<br>Concerns about bias                                                                                                                                                                                                                                                |
|-----------------------------------------------------------------------------------------------------------------------------------------------------------------------------------------------------------------------|--------------------------------------------------------------------------------------------------------------------------------------------------------------------------------------------------------------------------------------------------------------------------------------------------------------------------------------------------------------------------------------------------------------------------------------------------------------------------------------------------------------------------------------------------------------------------------------------------------------------------------------------------------------------------------------------------------------------------|---------------------------------------------------------------------------------------------------------------------------------------------------------------------------------------------------------------------------------------------|------------------------------------------------------------------------------------------------------------------------------------------------------------------------------------------------------------------------------------------------------------------------------|
| <p>Gunasekera et al., 2014<sup>4</sup></p> <p><b>Patient recruitment and experiences in a randomised trial of supervised exercise training for individuals with abdominal aortic aneurysm</b></p> <p>J.Vasc.Nurs.</p> | <p><u>Research Design:</u> Randomized controlled trial</p> <p><u>Recruitment:</u></p> <ul style="list-style-type: none"> <li>-Identified from surveillance list from a large hospital trust in Sheffield, UK, and Rotherham, UK</li> <li>-Patients invited by letter (81.7% response rate to letter, 6.4% declined due to disinterest, overall recruitment rate 5.1%)</li> <li>-Recruited patients between Jan 2010 and Sep 2011</li> </ul> <p><u>Population meeting criteria:</u></p> <ul style="list-style-type: none"> <li>N = 28 completed baseline (overall recruitment rate of 5.1%)</li> <li>-86% male (24/28)</li> <li><u>Age:</u> mean 72 years old (50-85 years old)</li> <li><u>Location:</u> U.K.</li> </ul> | <p><u>Time Points:</u></p> <ul style="list-style-type: none"> <li>Baseline</li> <li>12 weeks follow-up</li> </ul> <p><u>Outcomes:</u></p> <ul style="list-style-type: none"> <li>-SF-36 was used, but data not presented in this</li> </ul> | <p><b>Shock</b></p> <p><b>Fatalism</b></p> <p><b>Uncertainty</b></p> <p><b>No effect or Ambivalence</b></p> <p><u>Concerns about Bias:</u></p> <ul style="list-style-type: none"> <li>-Qualitative</li> <li>-Recruitment rate of only 5.1%</li> </ul>                        |
| <p>Petersson et al., 2013<sup>5</sup></p> <p><b>To be under control: a qualitative study of patients' experiences living with the diagnosis of abdominal aortic aneurysm</b></p> <p>J.Cardiovasc.Nurs.</p>            | <p><u>Research Design:</u> Interview</p> <p><u>Recruitment:</u></p> <ul style="list-style-type: none"> <li>-Telephone calls</li> <li>-Outpatient clinic</li> <li>-Spoke Swedish</li> </ul> <p><u>Population meeting criteria:</u></p> <ul style="list-style-type: none"> <li>-n = 10 patients interviewed</li> <li>-80% men (8 male, 2 female)</li> <li>-interviews conducted between April 2007-Dec 2008</li> </ul>                                                                                                                                                                                                                                                                                                     | <p><u>Time Points:</u></p> <ul style="list-style-type: none"> <li>Only 1 was newly diagnosed, but all were asked to reflect back on their diagnosis</li> </ul>                                                                              | <p><b>Shock</b></p> <p><b>Anxiety</b></p> <p><b>Fatalism</b></p> <p><b>Distress</b></p> <p><b>Burden about protecting others from worrying (especially family members)</b></p> <p><b>Guilt/Regret</b></p> <p><b>Helplessness/Powerlessness</b></p> <p><b>Uncertainty</b></p> |

|                                                                                                                                                                                   |                                                                                                                                                                                                                                                                                                                                                                                                        |                                                                       |                                                                                                                                                                                                                                                                                                                                                       |
|-----------------------------------------------------------------------------------------------------------------------------------------------------------------------------------|--------------------------------------------------------------------------------------------------------------------------------------------------------------------------------------------------------------------------------------------------------------------------------------------------------------------------------------------------------------------------------------------------------|-----------------------------------------------------------------------|-------------------------------------------------------------------------------------------------------------------------------------------------------------------------------------------------------------------------------------------------------------------------------------------------------------------------------------------------------|
|                                                                                                                                                                                   | <p>-undergoing conservative treatment (but reflecting back)</p> <p><u>Age:</u> mean 72.4 years old (range 63-82 years old)</p> <p><u>Location:</u> Sweden</p>                                                                                                                                                                                                                                          |                                                                       | <p><u>Concerns about Bias:</u></p> <p>-Recall: only 1 was newly diagnosed, but all were asked to reflect back on their diagnosis</p> <p>-Participants did not verify the interpretations reflected by the paper's selected themes and subthemes</p>                                                                                                   |
| <p>Hansson et al., 2012<sup>9</sup></p> <p><b>Opening Pandora's box: The experiences of having an asymptomatic aortic aneurysm under surveillance</b></p> <p>Health Risk Soc.</p> | <p><u>Research Design:</u> Interview</p> <p><u>Recruitment:</u></p> <p>-Participating in AAA screening started in 2009</p> <p><u>Population meeting criteria:</u></p> <p>N = 15 participants (24 were invited, 9 declined due to lack of interest, transport problems, other preoccupying illness)</p> <p>-All men</p> <p><u>Age:</u> 65 years old</p> <p><u>Location:</u> Vastra Gotaland, Sweden</p> | <p><u>Time Points:</u> 2 to 4 months after initial screen for AAA</p> | <p><u>Themes:</u></p> <p><b>Anxiety</b></p> <p><b>Fatalism</b></p> <p><b>Burden about protecting others from worrying (especially family members)</b></p> <p><b>Guilt/Regret</b></p> <p><b>No effects or ambivalence</b></p> <p><u>Concerns about bias:</u></p> <p>-Qualitative content analysis</p> <p>-Selection bias: declining to participate</p> |

Evidence Tables: PCa Qualitative Studies

| Author, Year, Title, Journal                                                                                                                                                                             | Recruitment, Research Design, Study Population                                                                                                                                                                                                                                                                                                                                                                                                                                                                                                                                                                                                                                                                         | Time Points                                                                                                                                                                      | Themes<br>Concerns about bias                                                                                                                                                                                                                                                                                                                                                                                                                                                                                                  |
|----------------------------------------------------------------------------------------------------------------------------------------------------------------------------------------------------------|------------------------------------------------------------------------------------------------------------------------------------------------------------------------------------------------------------------------------------------------------------------------------------------------------------------------------------------------------------------------------------------------------------------------------------------------------------------------------------------------------------------------------------------------------------------------------------------------------------------------------------------------------------------------------------------------------------------------|----------------------------------------------------------------------------------------------------------------------------------------------------------------------------------|--------------------------------------------------------------------------------------------------------------------------------------------------------------------------------------------------------------------------------------------------------------------------------------------------------------------------------------------------------------------------------------------------------------------------------------------------------------------------------------------------------------------------------|
| <p>Kronenwetter et al., 2005<sup>10</sup></p> <p><b>A qualitative analysis of interviews of men with early stage prostate cancer: the Prostate Cancer Lifestyle Trial</b></p> <p>Cancer Nurs.</p>        | <p><u>Research Design:</u> semi-structured, face-to-face interviews, 45 to 60 minutes long each</p> <p><u>Recruitment:</u> sub-sample amongst the 44 experimental participants in Prostate Cancer Lifestyle Trial (PCLT)<br/>-enrolling was rolling (different time points)</p> <p><u>Population meeting criteria:</u><br/>N = 26 analyzed (29 enrolled but 3 interviews lost)<br/>-90% had specialized training or college or above<br/>-over 90% were Caucasian</p> <p><u>Age:</u> range 50-85 years old, mean 67</p> <p><u>Location:</u> Unclear, UCSF IRB approval given</p>                                                                                                                                       | <p><u>Time Points:</u><br/>Time from enrollment in PCLT to face-to-face interview varied from 8 to 64 months, but participants were asked to reflect back on their diagnosis</p> | <p><b>Depression</b><br/><b>Anxiety</b><br/><b>Fatalism</b><br/><b>Denial</b><br/><b>Distress</b><br/><b>Loneliness</b></p> <p><u>Concerns about bias:</u><br/>Participants were prescribed an intensive lifestyle program<br/>Enrollment was rolling (different time points)</p>                                                                                                                                                                                                                                              |
| <p>Ervik et al., 2010<sup>6</sup></p> <p><b>Hit by waves-living with local advanced or localized prostate cancer treated with endocrine therapy or under active surveillance</b></p> <p>Cancer Nurs.</p> | <p><u>Research design:</u> Interview, 60-90min interviews (at home, workplace, or during follow-up at outpatient services at hospital)</p> <p><u>Recruitment:</u> Outpatient service of a University hospital</p> <p><u>Population meeting criteria:</u><br/>N = 10 (47%) were included in the study<br/>21 invited, 12 (57%) gave approval, (1 excluded because interview was too distressing due to his current life situation, 1 did not meet inclusion criteria); only 3 were active surveillance, but themes were pooled from the 10 included<br/>-diagnosed within previous 3 years<br/>-must speak and understand Norwegian</p> <p><u>Age:</u> median 71 (range 59-83)</p> <p><u>Location:</u> North Norway</p> | <p><u>Time points:</u><br/>Diagnosed within the prior 3 years<br/>Time since diagnosis at interview (range 3-36mo, median 9.5mo)</p>                                             | <p><b>Shock</b><br/><b>Anxiety</b><br/><b>Fatalism</b><br/><b>Psychological impact of sexual dysfunction</b><br/><b>Burden about protecting others from worrying (especially family members)</b><br/><b>Loneliness</b></p> <p><u>Limitations:</u><br/>-All had lost at least 1 close family member or friend to cancer<br/>-Only 10/21 invited (47%) participated<br/>-Recall: participants were asked to reflect back on their diagnosis<br/>-Exclusion of 1 participant because the interview would be “too distressing”</p> |
| <p>Wall et al., 2013<sup>7</sup></p> <p><b>Responding to a diagnosis of localized prostate cancer: men's experiences</b></p>                                                                             | <p><u>Research Design:</u><br/>Semistructured interview</p> <p><u>Recruitment:</u></p>                                                                                                                                                                                                                                                                                                                                                                                                                                                                                                                                                                                                                                 | <p><u>Time Points:</u><br/>Interviewed within the first 3 months of diagnosis</p>                                                                                                | <p><b>Shock</b><br/><b>No effects or ambivalence</b></p> <p><u>Concerns about bias:</u><br/>-Only 1 patient was watchful waiting and met inclusion criteria</p>                                                                                                                                                                                                                                                                                                                                                                |

|                                                                                                                                                                   |                                                                                                                                                                                                                                                                                                                                                                                                                                                                                                                                                                                                                                |                                                                                                                                                                                                       |                                                                                                                                                                                                                                                                                                                                                                                                                                                              |
|-------------------------------------------------------------------------------------------------------------------------------------------------------------------|--------------------------------------------------------------------------------------------------------------------------------------------------------------------------------------------------------------------------------------------------------------------------------------------------------------------------------------------------------------------------------------------------------------------------------------------------------------------------------------------------------------------------------------------------------------------------------------------------------------------------------|-------------------------------------------------------------------------------------------------------------------------------------------------------------------------------------------------------|--------------------------------------------------------------------------------------------------------------------------------------------------------------------------------------------------------------------------------------------------------------------------------------------------------------------------------------------------------------------------------------------------------------------------------------------------------------|
| <p><b>of normal distress during the first 3 postdiagnostic months</b></p> <p>Cancer Nurs.</p>                                                                     | <p>-Recruited by urology clinics<br/>Comparison Groups and Time Points: BUT all but 1 received treatment<br/>12 pts recruited from 2 urologists in metropolitan area, 1 from urologist in Western Australia</p> <p><u>Population meeting criteria:</u><br/>n = 10 included in analysis (13 originally but 2 withdrew and 1 incorrectly recruited)<br/>-all but 1 received treatment<br/>-diagnosed with localized prostate cancer within the last 4 weeks<br/>-spoke English<br/>-Anglo-Celtic participants</p> <p><u>Age:</u> Average age 63.4 years old, range 48-77 years old</p> <p><u>Location:</u> Western Australia</p> |                                                                                                                                                                                                       | <p>-Selection bias: Urologists did not report the number of men who were approached to participate in the study or why they were excluded or declined to participate</p>                                                                                                                                                                                                                                                                                     |
| <p>Wallace and Storms, 2007<sup>8</sup></p> <p><b>The needs of men with prostate cancer: results of a focus group study</b></p> <p>2007</p> <p>Appl.Nurs.Res.</p> | <p><u>Research Design:</u> Focus group</p> <p><u>Recruitment:</u><br/>-Open enrollment until each focus group had a minimum of 10 participants<br/>-Newspaper, ads, direct mailing to former/current support program users, flyers via affiliated urology<br/>-Convenience sampling design<br/>-English speaking</p> <p><u>Population meeting criteria:</u><br/>N = 17 total (but men were at various stages of treatment for prostate cancer)</p> <p><u>Age:</u> 49-81 years old (mean = 66.75 years old)</p> <p><u>Location:</u> not specified</p>                                                                           | <p><u>Time Points:</u><br/>-Diagnosed between 6 months and 12 years earlier<br/>-Average time since diagnosis at interview: 4.3 years<br/>-Patients were asked to reflect back on their diagnosis</p> | <p><b>Shock</b><br/><b>Fatalism</b><br/><b>Loneliness</b></p> <p><u>Concerns about bias:</u><br/>-Qualitative - focus group design<br/>-Selection bias - volunteer to participate in focus group; ads explained the study and encouraged participants to contact the researcher if they had questions or were interested in participating in the study<br/>-Small number of participants<br/>-Patients had to reflect back on their diagnosis experience</p> |



**Appendix E:**

**Evidence Tables: Population Based Studies Prostate Cancer**

| Article                                                                                                                                                                                                           | Population                                                                                                                                                                                                                                                                                                                                                                                                                                                                                                                                                                                                                                             | Recruitment, Comparison Group, Time Point, Outcome Measures                                                                                                                                                                                                                                                                                                                                                                                                                                                                                                                                                                                                                             | Outcomes and reported results<br>Concerns about bias                                                                                                                                                                                                                                                                                                                                                                                                                                                                                                                                                                                                                                                                                                                                                                                                                                                                                                                                                                                                                                              |
|-------------------------------------------------------------------------------------------------------------------------------------------------------------------------------------------------------------------|--------------------------------------------------------------------------------------------------------------------------------------------------------------------------------------------------------------------------------------------------------------------------------------------------------------------------------------------------------------------------------------------------------------------------------------------------------------------------------------------------------------------------------------------------------------------------------------------------------------------------------------------------------|-----------------------------------------------------------------------------------------------------------------------------------------------------------------------------------------------------------------------------------------------------------------------------------------------------------------------------------------------------------------------------------------------------------------------------------------------------------------------------------------------------------------------------------------------------------------------------------------------------------------------------------------------------------------------------------------|---------------------------------------------------------------------------------------------------------------------------------------------------------------------------------------------------------------------------------------------------------------------------------------------------------------------------------------------------------------------------------------------------------------------------------------------------------------------------------------------------------------------------------------------------------------------------------------------------------------------------------------------------------------------------------------------------------------------------------------------------------------------------------------------------------------------------------------------------------------------------------------------------------------------------------------------------------------------------------------------------------------------------------------------------------------------------------------------------|
| <p>Fall et al, 2009<sup>11</sup></p> <p><b>Immediate risk for cardiovascular events and suicide following a prostate cancer diagnosis: prospective cohort study</b></p> <p>PLoS Med.</p>                          | <p><u>Database:</u></p> <ul style="list-style-type: none"> <li>• <b>Nationwide Swedish Cancer Register and Inpatient registers</b></li> <li>• All men born in Sweden who were 30 years old or older between <b>01/01/1961 to 12/31/2004</b></li> </ul> <p><u>Population meeting criteria</u></p> <ul style="list-style-type: none"> <li>• n = 168,584 with prostate cancer analyzed (173,701 diagnosed with prostate cancer during the study period, but 5,117 of these diagnoses occurred at autopsy)</li> </ul> <p><u>Study Design:</u> Cohort</p> <p><u>Age:</u> mean 73.4 years old, range 31.6-102.5 years old</p> <p><u>Location:</u> Sweden</p> | <p><u>Comparison groups:</u> Cancer-free registry members meeting the same criteria</p> <p><u>Time points:</u></p> <ul style="list-style-type: none"> <li>• 1 week since diagnosis</li> <li>• 2-4 weeks since diagnosis</li> <li>• 5-26 weeks since diagnosis</li> <li>• 27-52 weeks since diagnosis</li> </ul> <p>Follow-up ended at whichever came first:</p> <ul style="list-style-type: none"> <li>• 1 year after diagnosis</li> <li>• Cardiovascular event or suicide</li> <li>• Death from another cause</li> <li>• Emigration out of Sweden</li> <li>• 12/31/2004</li> </ul> <p>Extended follow-up was also performed</p> <p><u>Outcomes:</u> Suicide, Cardiovascular events</p> | <p><u>Themes:</u></p> <p><b>Suicide:</b> risk of suicide was highest during <b>1<sup>st</sup> week after diagnosis</b> (RR 8.4, 95% CI: 1.9-22.7) then declined with time since diagnosis (after 1<sup>st</sup> year of follow-up: RR 1.8, 95% CI: 1.6, 2.0); especially among men 54 years old or younger</p> <p><b>Cardiovascular events:</b> risks were highest closer to diagnosis (<b>during 1<sup>st</sup> week after diagnosis</b> from 1961-1986, RR 11.2, 95% CI: 10.4, 12.1; and from 1987-2004: RR 2.8, 95% CI: 1.3, 1.3), but declined over time (after 1<sup>st</sup> year: RR 1.1; 95% CI: 1.1, 1.1), even after adjusting for cardiovascular events before diagnosis; especially among men 54 years old or younger.</p> <p><u>Concerns about bias:</u></p> <ul style="list-style-type: none"> <li>• Register initiated for administrative purposes in 1964. Only 60% national coverage in 1969, but this increased to 100% in 1987</li> <li>• Underreporting of suicides (suggests bias toward underestimating suicide rates)</li> <li>• Treatment anticipation unknown</li> </ul> |
| <p>Fang et al, 2010<sup>12</sup></p> <p><b>Immediate risk of suicide and cardiovascular death after a prostate cancer diagnosis: cohort study in the United States</b></p> <p>2010</p> <p>J.Natl.Cancer Inst.</p> | <p><u>Database:</u> <b>SEER (Surveillance, Epidemiology, and End Results Program)</b></p> <p>Diagnosed with Prostate Cancer <b>From 01/01/1979 to 12/31/2004</b></p> <p><u>Population meeting criteria</u></p> <ul style="list-style-type: none"> <li>• n = 345,384 enrolled</li> <li>• 342,497 analyzed registry</li> <li>• n = 288,077 who had local or regional prostate cancer</li> </ul> <p><u>Age:</u> mean 70.2 years old</p> <p><u>Location:</u> United States population</p>                                                                                                                                                                  | <p><u>Time Points:</u> follow-up until 1 year after diagnosis</p> <p><u>Comparison group:</u> US male population</p> <p><u>Outcome:</u> Suicides</p>                                                                                                                                                                                                                                                                                                                                                                                                                                                                                                                                    | <p><u>Themes:</u></p> <p><b>Suicide:</b> Higher rates of suicide in the <b>first year</b> after diagnosis (SMR 1.4; 95% CI: 1.2, 1.6), especially during the <b>first 3 months</b> after diagnosis (SMR 1.9; 95% CI: 1.4, 2.6)</p> <ul style="list-style-type: none"> <li>• Being single, separated or divorced, or widowed was associated with a higher risk of suicide than being married</li> <li>• 148 suicides in the first year; expected 105.2 suicides based on age in US male population</li> <li>• Also increased risk in earlier calendar years: in pre-PSA and peri-PSA eras</li> </ul> <p><b>Cardiovascular events:</b> The risk of cardiovascular death was slightly elevated during the first year (SMR = 1.09, 95% CI = 1.06 to 1.12), with the highest risk in the <b>first month</b> (SMR = 2.05, 95% CI = 1.89 to 2.22), after diagnosis.</p> <p><u>Concerns about bias:</u></p> <ul style="list-style-type: none"> <li>• <b>No cancer-free group was available as reference</b></li> <li>• <b>No information about comorbid illness rates</b></li> </ul>                      |

|                                                                                                                                                        |                                                                                                                                                                                                                                                                                                                                                                                                                                                                                                                                                                                 |                                                                                                                                                                                                                                                                                                                               |                                                                                                                                                                                                                                                                                                                                                                                                                                                                                                                                                                                                                                                                                                                                                                                                                                                                                                                                                                                                                                                                                                                                                                                                                                                                                                                                                                                                                                                                                                                    |
|--------------------------------------------------------------------------------------------------------------------------------------------------------|---------------------------------------------------------------------------------------------------------------------------------------------------------------------------------------------------------------------------------------------------------------------------------------------------------------------------------------------------------------------------------------------------------------------------------------------------------------------------------------------------------------------------------------------------------------------------------|-------------------------------------------------------------------------------------------------------------------------------------------------------------------------------------------------------------------------------------------------------------------------------------------------------------------------------|--------------------------------------------------------------------------------------------------------------------------------------------------------------------------------------------------------------------------------------------------------------------------------------------------------------------------------------------------------------------------------------------------------------------------------------------------------------------------------------------------------------------------------------------------------------------------------------------------------------------------------------------------------------------------------------------------------------------------------------------------------------------------------------------------------------------------------------------------------------------------------------------------------------------------------------------------------------------------------------------------------------------------------------------------------------------------------------------------------------------------------------------------------------------------------------------------------------------------------------------------------------------------------------------------------------------------------------------------------------------------------------------------------------------------------------------------------------------------------------------------------------------|
| <p>Dalela et al., 2015<sup>13</sup></p> <p><b>Suicide and accidental deaths among patients with non-metastatic prostate cancer</b></p> <p>BJU Int.</p> | <p><b>Database:</b> SEER (Surveillance, Epidemiology, and End Results Program), all men diagnosed with prostate cancer from <b>1/1/88 to 12/31/10</b> (only 4.9% metastatic) in the United States</p> <p><u>Population meeting criteria:</u><br/>524,965 with adenocarcinoma of prostate</p> <p><u>Age:</u><br/>40-54yo (54679, 10.4%)<br/>55-69yo (274812, 52.3%)<br/>70+ yo (195474, 37.2%)</p> <p><u>Clinical disease:</u><br/>Localized (425,335, 81.0%)<br/>Regional (68873, 13.1%)<br/>Metastatic (25945, 4.9%)<br/>Unknown (4812, 0.9%)</p> <p><u>Location:</u> U.S.</p> | <p><b>Time point:</b> Years after diagnosis</p> <p><b>Outcome:</b> Suicides</p> <p><b>Comparison Group:</b><br/>SEER men prostate cancer vs. men diagnosed with all other solid cancers</p>                                                                                                                                   | <p><b>Results and Themes:</b></p> <p><b>Suicide:</b> Men with prostate cancer were at significantly higher risk of suicidal and accidental deaths within the <b>first year of diagnosis</b> than individuals diagnosed with other solid cancers</p> <ul style="list-style-type: none"> <li>○ Within <b>3 months</b> of diagnosis: ARR 3.98 (95% CI: 3.02, 5.23)</li> </ul> <p><b>Concerns about bias:</b> None</p> <ul style="list-style-type: none"> <li>• The use of men diagnosed with other solid cancers helps to decrease the confounding of potential pre-existing comorbidities and higher rates of psychiatric disorders among cancer patients</li> </ul>                                                                                                                                                                                                                                                                                                                                                                                                                                                                                                                                                                                                                                                                                                                                                                                                                                                 |
| <p>Carlsson et al., 2013<sup>14</sup></p> <p><b>Risk of suicide in men with low-risk prostate cancer</b></p> <p>Eur.J.Cancer</p>                       | <p><b>Database:</b> Prostate Cancer data Base Sweden (<b>PCBaSe</b>) <b>2.0</b> (nation-wide, population based database, comparing 105,736 men diagnosed with prostate cancer between <b>01/01/1997 to 12/31/2009</b></p> <p><i>PCBaSe 2.0 differs from PCBaSe because longer follow up, selection of control series of those without prostate cancer</i></p> <p><u>Population meeting criteria:</u><br/>27,502 were watchful waiting (out of 105,736 men diagnosed with prostate cancer)<br/>Expectancy group = watchful waiting</p> <p><u>Location:</u> Sweden</p>            | <p><b>Comparison Groups:</b><br/>Compared to 528,658 matched men without prostate cancer</p> <p><b>Time points:</b><br/>Within 6 months of diagnosis</p> <p><b>Outcomes:</b></p> <ul style="list-style-type: none"> <li>• Looks at prescription filings as a proxy for mental health</li> <li>• Suicide ICD10 code</li> </ul> | <p><b>Suicide:</b></p> <p>Within 6mo of diagnosis: RR 3.2 among M0 Pca men<br/>Within 6mo of diagnosis: RR 6.5 (95%CI 4-10) among all Pca men</p> <ul style="list-style-type: none"> <li>▪ 38 suicides among Pca (26 detected by sx; IR 0.73 per 1000P-Y; vs. 30 suicides among PrCa-)</li> </ul> <p>Among expectancy (WW) group: 3 deaths (8%) within 6mo; 49 deaths (23%) compared to all Pca group 27,502 suicides (26%)</p> <p>Within 6 months of diagnosis among men with low risk prostate cancer: 7 suicides out of 12612 people<br/>Within 6 months of diagnosis among those detected by health control: 5 suicides out of 12,140 people<br/>Low risk group: 7 deaths (18%) within 6mo; 49 deaths (23%) compared to all Pca group 25,297 suicides (24%)</p> <p><b>Themes:</b></p> <p><b>Suicide:</b> Men diagnosed with PC (also low risk) had increased risk of suicide especially shortly after diagnosis. But, patients receiving watchful waiting had a lower risk of suicide in first 6 months than other treatment modalities. Higher absolute risk of suicide in ever uses of <b>prescription mental health</b> than never users (this is an attempt to guess at a history of mental illness)</p> <p><b>Concerns about bias:</b></p> <ul style="list-style-type: none"> <li>• Registry data</li> <li>• The use of prescription mental health medications as a proxy is not necessarily accurate. No historical data about psychiatric hospitalizations, non-prescription treatment, etc.</li> </ul> |

|                                                                                                                                                                                                                                |                                                                                                                                                                                                                                                                                                                                                                                                                                                                                                                                                                                                                     |                                                                                                                                                                                                                                                                                                                                                                                                                |                                                                                                                                                                                                                                                                                                                                                                                                                                                                                                                                                                                                                                                                                                                                                                                                                                                                                                                                                                                                                                                                                                                                                                                                                                                                                                                                                                                                                                                                                                                                                                                                                                                                                                                                                                                                                                                                                                                                                                                                                                                                                                                                                                                                                                                                                                                                                                                                                                                                                                                                                                                                                                                                                            |
|--------------------------------------------------------------------------------------------------------------------------------------------------------------------------------------------------------------------------------|---------------------------------------------------------------------------------------------------------------------------------------------------------------------------------------------------------------------------------------------------------------------------------------------------------------------------------------------------------------------------------------------------------------------------------------------------------------------------------------------------------------------------------------------------------------------------------------------------------------------|----------------------------------------------------------------------------------------------------------------------------------------------------------------------------------------------------------------------------------------------------------------------------------------------------------------------------------------------------------------------------------------------------------------|--------------------------------------------------------------------------------------------------------------------------------------------------------------------------------------------------------------------------------------------------------------------------------------------------------------------------------------------------------------------------------------------------------------------------------------------------------------------------------------------------------------------------------------------------------------------------------------------------------------------------------------------------------------------------------------------------------------------------------------------------------------------------------------------------------------------------------------------------------------------------------------------------------------------------------------------------------------------------------------------------------------------------------------------------------------------------------------------------------------------------------------------------------------------------------------------------------------------------------------------------------------------------------------------------------------------------------------------------------------------------------------------------------------------------------------------------------------------------------------------------------------------------------------------------------------------------------------------------------------------------------------------------------------------------------------------------------------------------------------------------------------------------------------------------------------------------------------------------------------------------------------------------------------------------------------------------------------------------------------------------------------------------------------------------------------------------------------------------------------------------------------------------------------------------------------------------------------------------------------------------------------------------------------------------------------------------------------------------------------------------------------------------------------------------------------------------------------------------------------------------------------------------------------------------------------------------------------------------------------------------------------------------------------------------------------------|
| <p>Bill-Axelsson et al., 2010<sup>15</sup></p> <p><b>Suicide risk in men with prostate-specific antigen-detected early prostate cancer: a nationwide population-based cohort study from PCBaSe Sweden</b></p> <p>Eur.Urol.</p> | <p><b>Database:</b> PCBaSe Sweden, includes all cases registered in the National Prostate Cancer Register (NPCR) of Sweden following a diagnosis of prostate cancer from <b>01/01/1997 to 12/31/2006</b></p> <p><u>Population meeting criteria</u></p> <ul style="list-style-type: none"> <li>n = 77,439 prostate cancer cases in the Swedish NPCR <ul style="list-style-type: none"> <li>22,405 had T1c tumors</li> <li>22,929 had locally advanced disease</li> <li>8,350 had distant metastases</li> </ul> </li> <li>23.4% had expectancy as planned initial treatment</li> </ul> <p><u>Location:</u> Sweden</p> | <p><u>Comparison group:</u> background population, prostate cancer patients who received treatment, metastatic disease</p> <p><u>Time points:</u></p> <ul style="list-style-type: none"> <li>Follow-up among patients who died due to intentional self-harm: mean 2.1 years, SD 1.8 years</li> <li>Among full prostate cancer cohort: mean 3.4 years, SD 2.5 years</li> </ul> <p><u>Outcomes:</u> Suicides</p> | <p><b>Outcomes and Results</b></p> <ul style="list-style-type: none"> <li>Pooled data: significantly increased risk of suicide during the first and second years after diagnosis (SMR: 2.2; 95% CI: 1.5, 3.0) <ul style="list-style-type: none"> <li>128 suicides among the 77,439 prostate cancer cases in the NPCR compared with an expected number of 85 (SMR: 1.5; 95% CI, 1.3–1.8)</li> </ul> </li> <li>Statistically significantly increased risk of suicide among men with locally advanced or metastatic disease <ul style="list-style-type: none"> <li>Among the 22,929 men with locally advanced nonmetastatic tumors: the risk of suicide was statistically significantly increased (SMR: 2.2; 95% CI, 1.6–2.9)</li> <li>Among the 8,350 men with distant metastases: the risk of suicide was statistically significantly increased (SMR: 2.1; 95% CI, 1.2–3.6)</li> </ul> </li> <li>BUT among the 22,405 men with PSA-detected T1c tumors: the risk of suicide was not increased (SMR: 1.0; 95% CI, 0.6–1.5)</li> </ul> <p><b>Themes:</b></p> <p><b>Suicide:</b> Pooled data showed significantly increased risk of suicide during the first and second years after diagnosis (SMR: 2.2; 95% CI: 1.5, 3.0)</p> <ul style="list-style-type: none"> <li>128 suicides among the 77,439 prostate cancer cases in the NPCR compared with an expected number of 85 (SMR: 1.5; 95% CI, 1.3–1.8)</li> </ul> <ul style="list-style-type: none"> <li><b>Statistically significantly increased risk of suicide among men with locally advanced or metastatic disease</b> <ul style="list-style-type: none"> <li>Among the 22,929 men with locally advanced nonmetastatic tumors: the risk of suicide was statistically significantly increased (SMR: 2.2; 95% CI, 1.6–2.9)</li> <li>Among the 8,350 men with distant metastases: the risk of suicide was statistically significantly increased (SMR: 2.1; 95% CI, 1.2–3.6)</li> </ul> </li> </ul> <p><b>Concerns about bias:</b></p> <ul style="list-style-type: none"> <li>Most data is pooled – not always the specific population we want to identify (no information on treatment or disease stage for those within 0-6mo of diagnosis)</li> <li>Registry-based (suicide based on ICD code), cannot determine causality, modest rates of study enrollment and racial differences, unknown potential effects of comorbid medical and psychiatric conditions small numbers of suicides</li> <li>BUT among the 22,405 men with PSA-detected T1c tumors: the risk of suicide was not increased (SMR: 1.0; 95% CI, 0.6–1.5) – may be because opportunistic screen, health-conscious men were more willing to accept the results</li> </ul> |
| <p>Klaassen et al., 2015<sup>16</sup></p> <p><b>Factors associated</b></p>                                                                                                                                                     | <p><b>Database:</b> SEER (Surveillance, Epidemiology, and End Results Program), <b>1988 through 2010</b></p>                                                                                                                                                                                                                                                                                                                                                                                                                                                                                                        | <p><u>Comparison Group:</u> Compared to the general U.S. population based on data from CDC and Prevention's National center for Injury Prevention and Control (1999-2010)</p>                                                                                                                                                                                                                                  | <p><b>Results and Themes:</b></p>                                                                                                                                                                                                                                                                                                                                                                                                                                                                                                                                                                                                                                                                                                                                                                                                                                                                                                                                                                                                                                                                                                                                                                                                                                                                                                                                                                                                                                                                                                                                                                                                                                                                                                                                                                                                                                                                                                                                                                                                                                                                                                                                                                                                                                                                                                                                                                                                                                                                                                                                                                                                                                                          |

|                                                                                                                                                                                                                 |                                                                                                                                                                                                                                                                                                                                                                                                                                                                                  |                                                                                                                                                                                                                                                                                                                                                                                                                                                                                                                                                                                                                                                                                                                                                                                                                                                                                                                                                                                                            |                                                                                                                                                                                                                                                                                                                                                                                                                                                                                                                                                                                                                                                                                                                                                                                                                                                                                                                                                                                                                                                                                                      |
|-----------------------------------------------------------------------------------------------------------------------------------------------------------------------------------------------------------------|----------------------------------------------------------------------------------------------------------------------------------------------------------------------------------------------------------------------------------------------------------------------------------------------------------------------------------------------------------------------------------------------------------------------------------------------------------------------------------|------------------------------------------------------------------------------------------------------------------------------------------------------------------------------------------------------------------------------------------------------------------------------------------------------------------------------------------------------------------------------------------------------------------------------------------------------------------------------------------------------------------------------------------------------------------------------------------------------------------------------------------------------------------------------------------------------------------------------------------------------------------------------------------------------------------------------------------------------------------------------------------------------------------------------------------------------------------------------------------------------------|------------------------------------------------------------------------------------------------------------------------------------------------------------------------------------------------------------------------------------------------------------------------------------------------------------------------------------------------------------------------------------------------------------------------------------------------------------------------------------------------------------------------------------------------------------------------------------------------------------------------------------------------------------------------------------------------------------------------------------------------------------------------------------------------------------------------------------------------------------------------------------------------------------------------------------------------------------------------------------------------------------------------------------------------------------------------------------------------------|
| <p><b>with suicide in patients with genitourinary malignancies</b></p> <p>Cancer</p>                                                                                                                            | <p><b>Population meeting criteria:</b></p> <ul style="list-style-type: none"> <li>Exact number of prostate cancer patients not specified, but 5,111,975 person-years</li> <li>1,239,522 individuals with genitourinary malignancies</li> </ul>                                                                                                                                                                                                                                   | <p><b>Time points:</b> Years after diagnosis</p> <p><b>Outcome:</b><br/>Suicide<br/>Calculated standardized mortality ratios (SMR)</p>                                                                                                                                                                                                                                                                                                                                                                                                                                                                                                                                                                                                                                                                                                                                                                                                                                                                     | <p>Suicide:<br/>Prostate cancer patients had higher rates of suicide, especially <math>\geq 15</math> years since diagnosis</p> <p>Prostate cancer patients overall (all stages of disease): 1613 (SMR 1.37; 95% CI: 0.99 – 1.86)</p> <ul style="list-style-type: none"> <li>Locoregional PC had similar suicide rates (969 suicides, SMR 1.16 (95% CI: 0.81-1.60))</li> <li>Unstaged PC: 46 suicides with SMR 1.62 (95% CI 1.20-2.16)</li> <li>Unknown PC stage: 540 suicides with SMR 1.83 (95% CI 1.39-2.41)</li> </ul> <p>Suicide rates stratified by time since diagnosis (pooled Prostate Cancer data)</p> <ul style="list-style-type: none"> <li>0-5 years: SMR is 1.33 (95% CI: 0.95, 1.81)</li> <li>5-10 years: SMR 1.42 (95% CI: 1.02-1.91)</li> <li>10 to 15 years: SMR 1.39 (95% CI: 0.99-1.86)</li> <li><math>\geq 15</math> years: SMR 1.84 (95% CI: 1.39-2.41)</li> </ul> <p><b>Concerns about bias:</b></p> <ul style="list-style-type: none"> <li>No clarification of whether patients received treatment or not – we aren't sure if these patients are watchful waiting</li> </ul> |
| <p>Bill-Axelson et al., 2011<sup>17</sup></p> <p><b>Psychiatric treatment in men with prostate cancer--results from a Nation-wide, population-based cohort study from PCBaSe Sweden</b></p> <p>Eur.J.Cancer</p> | <p><b>Database: PCBaSe Sweden 01/01/1997 to 12/31/2006</b></p> <p>-PCBaSe Sweden is derived from the National Prostate Cancer Register (NPCR) of Sweden, which started in 1996 and covers more than 97% of all registered incident prostate cancers.</p> <p><b>Population meeting criteria:</b><br/>N = 18,924 are watchful waiting (expectancy category) out of the total 72,613 men with prostate cancer -68.6% were married (12,986)</p> <p><b>Age:</b> mean 73.5, SD 7.8</p> | <p><b>Comparison Group:</b> Compared to 217,839 men without prostate cancer</p> <p>Number of pre-study hospitalizations for depression:</p> <ul style="list-style-type: none"> <li>1: 86 (0.5) vs. men without prostate 896 (0.4)</li> <li>2+: 54 (0.3) vs. men without prostate 558 (0.3)</li> </ul> <p>Number of pre-study hospitalizations for anxiety:</p> <ul style="list-style-type: none"> <li>1: 21 (0.1) vs. men without prostate 263 (0.1)</li> <li>2+: 9 (&lt;0.1) vs. men without prostate 71 (&lt;0.1)</li> </ul> <p>Number of pre-study hospitalizations for stress:</p> <ul style="list-style-type: none"> <li>1: 13 (0.1) vs. men without prostate 275 (0.1)</li> <li>2+: 2 (&lt;0.1) vs. men without prostate 42 (&lt;0.1)</li> </ul> <p><b>Time Points:</b><br/>Years of f/u (mean, sd): 3.9, SD 2.6</p> <p><b>Outcomes:</b><br/>-Hospitalization for depression, anxiety, or PTSD<br/>-Outpatient treatment for depression, anxiety, or PTSD<br/>-Use of antidepressant medication.</p> | <p><b>Results and Themes:</b></p> <p><b>Psychiatric outcomes:</b> Significantly more psychiatric hospitalizations due to depression (RR 1.34, 95% CI: 1.11-1.62) and use of antidepressant medications (OR 1.38, 95% CI: 1.22-1.56) after diagnosis of PCa</p> <ul style="list-style-type: none"> <li>Psychiatric hospitalization due to anxiety (RR 1.15, 95% CI: 0.75, 1.75)</li> <li>Psychiatric hospitalization due to depression (RR 1.34, 95% CI: 1.11-1.62)</li> <li>Psychiatric outpatient visits due to PTSD (RR 1.30, 95% CI 0.72, 2.37)</li> <li>Use of antidepressant medications (OR 1.38, 95% CI: 1.22-1.56)</li> </ul> <p><b>Concerns about bias:</b><br/>Short follow-up time (mean 3.9yrs, SD 2.6yrs for men with prostate cancer)</p>                                                                                                                                                                                                                                                                                                                                              |
